# Supplementary material for: Quantum rotational dynamics of l-C4(3Σ−g) by H2 at low temperatures employing a machine learning augmented potential energy surface
Source: Royal Society of Chemistry journal article supplement (doi:10.1039/d3cp05424a), 2024-01-01

**Supplementary Information**

Quantum rotational dynamics of  $I\text{-C}_4$  ( $^3\Sigma^-_g$ ) by  $\text{H}_2$  at low temperatures  
employing machine learning augmented potential energy surface

*Pooja Chahal, Apoorv Kushwaha and T.J. Dhilip Kumar*  
*Quantum Dynamics Lab, Department of Chemistry*  
*Indian Institute of Technology Ropar, Rupnagar 140001, India*

## Table of Contents

|                                                                                                                                                                                                                 |            |
|-----------------------------------------------------------------------------------------------------------------------------------------------------------------------------------------------------------------|------------|
| <i>Table S1: Data of rate coefficients of excitation transitions for the comparison of para H<sub>2</sub> and ortho H<sub>2</sub> as a function of temperature.</i> .....                                       | <b>S3</b>  |
| <i>Table S2: Data of rate coefficients of de-excitation transitions for the comparison of para H<sub>2</sub> and He as a function of temperature.</i> .....                                                     | <b>S5</b>  |
| <i>Table S3: Python program for generating PES.</i> .....                                                                                                                                                       | <b>S7</b>  |
| <i>Table S4: Ab initio energies (C<sub>4</sub>-H<sub>2</sub>) at various geometries compared to recreated PES (from radial terms).</i> .....                                                                    | <b>S8</b>  |
| <i>Table S5: Computed properties of C<sub>4</sub> compared to previous literature.</i> .....                                                                                                                    | <b>S8</b>  |
| <i>Figure S1: Cross-sections for the rotational excitation transitions (1-N) of collision of C<sub>4</sub> with ortho H<sub>2</sub> till energy range of 300 cm<sup>-1</sup>.</i> .....                         | <b>S9</b>  |
| <i>Figure S2: Comparison between the cross-sections (<math>\Delta j = 2</math>) computed for C<sub>4</sub> molecule due to its collision with para and ortho H<sub>2</sub> for different transitions.</i> ..... | <b>S9</b>  |
| <i>Figure S3: Cross-sections for the rotational excitation transitions (<math>\Delta j = 2</math>) of collision of C<sub>4</sub> with ortho H<sub>2</sub> till energy range of 300 cm<sup>-1</sup>.</i> .....   | <b>S10</b> |
| <i>Figure S4: Cross-sections for the rotational excitation transitions (1-N) of collision of C<sub>4</sub> with para H<sub>2</sub> till energy range of 300 cm<sup>-1</sup>.</i> .....                          | <b>S10</b> |
| <i>Figure S5: PES at various angular coordinates (<math>\phi</math>, <math>\theta_2</math>, <math>\theta_1</math>, R) with respect to R.</i> .....                                                              | <b>S11</b> |
| <i>Figure S6: Variation of R (optimised) with respect to <math>\theta_2</math> vs <math>\theta_1</math> at <math>\phi = 0^\circ</math>.</i> .....                                                               | <b>S11</b> |

**Table S1: Data of rate coefficients of excitation transitions for the comparison of *para* H<sub>2</sub> and *ortho* H<sub>2</sub> as a function of temperature.**

| T (K) | <i>para</i> -H <sub>2</sub> |          |          |          | <i>ortho</i> -H <sub>2</sub> |          |          |          |
|-------|-----------------------------|----------|----------|----------|------------------------------|----------|----------|----------|
|       | 1-3                         | 1-5      | 1-7      | 1-9      | 1-3                          | 1-5      | 1-7      | 1-9      |
| 1     | 9.31E-12                    | 5.42E-14 | 4.76E-17 | 6.67E-21 | 1.03E-11                     | 7.23E-14 | 7.89E-17 | 8.8E-21  |
| 2     | 4.15E-11                    | 2.39E-12 | 5.87E-14 | 6.29E-16 | 4.34E-11                     | 3.22E-12 | 8.68E-14 | 7.19E-16 |
| 3     | 6.57E-11                    | 8.55E-12 | 6.51E-13 | 2.89E-14 | 6.93E-11                     | 1.12E-11 | 9.02E-13 | 3.24E-14 |
| 4     | 8.07E-11                    | 1.61E-11 | 2.2E-12  | 1.98E-13 | 8.67E-11                     | 2.07E-11 | 2.91E-12 | 2.22E-13 |
| 5     | 9E-11                       | 2.36E-11 | 4.58E-12 | 6.36E-13 | 9.87E-11                     | 2.97E-11 | 5.88E-12 | 7.14E-13 |
| 6     | 9.61E-11                    | 3.04E-11 | 7.5E-12  | 1.39E-12 | 1.07E-10                     | 3.77E-11 | 9.41E-12 | 1.57E-12 |
| 7     | 1E-10                       | 3.63E-11 | 1.07E-11 | 2.44E-12 | 1.13E-10                     | 4.45E-11 | 1.32E-11 | 2.76E-12 |
| 8     | 1.03E-10                    | 4.16E-11 | 1.39E-11 | 3.74E-12 | 1.17E-10                     | 5.03E-11 | 1.7E-11  | 4.22E-12 |
| 9     | 1.05E-10                    | 4.61E-11 | 1.71E-11 | 5.21E-12 | 1.21E-10                     | 5.53E-11 | 2.07E-11 | 5.89E-12 |
| 10    | 1.06E-10                    | 5.01E-11 | 2.02E-11 | 6.8E-12  | 1.23E-10                     | 5.96E-11 | 2.42E-11 | 7.7E-12  |
| 11    | 1.07E-10                    | 5.36E-11 | 2.32E-11 | 8.46E-12 | 1.25E-10                     | 6.32E-11 | 2.75E-11 | 9.57E-12 |
| 12    | 1.07E-10                    | 5.67E-11 | 2.59E-11 | 1.01E-11 | 1.26E-10                     | 6.63E-11 | 3.06E-11 | 1.15E-11 |
| 13    | 1.07E-10                    | 5.94E-11 | 2.85E-11 | 1.18E-11 | 1.27E-10                     | 6.9E-11  | 3.35E-11 | 1.33E-11 |
| 14    | 1.07E-10                    | 6.18E-11 | 3.09E-11 | 1.34E-11 | 1.27E-10                     | 7.13E-11 | 3.61E-11 | 1.52E-11 |
| 15    | 1.07E-10                    | 6.38E-11 | 3.3E-11  | 1.5E-11  | 1.27E-10                     | 7.32E-11 | 3.85E-11 | 1.69E-11 |
| 16    | 1.07E-10                    | 6.56E-11 | 3.5E-11  | 1.65E-11 | 1.28E-10                     | 7.48E-11 | 4.07E-11 | 1.86E-11 |
| 17    | 1.07E-10                    | 6.72E-11 | 3.68E-11 | 1.8E-11  | 1.27E-10                     | 7.62E-11 | 4.26E-11 | 2.02E-11 |
| 18    | 1.06E-10                    | 6.85E-11 | 3.84E-11 | 1.93E-11 | 1.27E-10                     | 7.73E-11 | 4.44E-11 | 2.16E-11 |
| 19    | 1.06E-10                    | 6.96E-11 | 3.98E-11 | 2.05E-11 | 1.26E-10                     | 7.82E-11 | 4.59E-11 | 2.3E-11  |
| 20    | 1.05E-10                    | 7.05E-11 | 4.11E-11 | 2.17E-11 | 1.26E-10                     | 7.89E-11 | 4.73E-11 | 2.43E-11 |
| 21    | 1.04E-10                    | 7.13E-11 | 4.23E-11 | 2.28E-11 | 1.25E-10                     | 7.95E-11 | 4.85E-11 | 2.54E-11 |
| 22    | 1.04E-10                    | 7.19E-11 | 4.33E-11 | 2.38E-11 | 1.24E-10                     | 7.99E-11 | 4.96E-11 | 2.65E-11 |
| 23    | 1.03E-10                    | 7.23E-11 | 4.42E-11 | 2.47E-11 | 1.23E-10                     | 8.02E-11 | 5.05E-11 | 2.74E-11 |
| 24    | 1.02E-10                    | 7.27E-11 | 4.5E-11  | 2.55E-11 | 1.22E-10                     | 8.03E-11 | 5.12E-11 | 2.83E-11 |
| 25    | 1.01E-10                    | 7.29E-11 | 4.56E-11 | 2.62E-11 | 1.21E-10                     | 8.03E-11 | 5.19E-11 | 2.9E-11  |
| 26    | 1E-10                       | 7.31E-11 | 4.62E-11 | 2.69E-11 | 1.2E-10                      | 8.03E-11 | 5.25E-11 | 2.97E-11 |
| 27    | 9.92E-11                    | 7.31E-11 | 4.67E-11 | 2.75E-11 | 1.19E-10                     | 8.01E-11 | 5.29E-11 | 3.03E-11 |
| 28    | 9.82E-11                    | 7.31E-11 | 4.71E-11 | 2.81E-11 | 1.18E-10                     | 7.99E-11 | 5.33E-11 | 3.09E-11 |
| 29    | 9.72E-11                    | 7.3E-11  | 4.74E-11 | 2.86E-11 | 1.17E-10                     | 7.96E-11 | 5.35E-11 | 3.14E-11 |
| 30    | 9.62E-11                    | 7.28E-11 | 4.77E-11 | 2.9E-11  | 1.15E-10                     | 7.93E-11 | 5.37E-11 | 3.18E-11 |
| 31    | 9.52E-11                    | 7.26E-11 | 4.79E-11 | 2.94E-11 | 1.14E-10                     | 7.89E-11 | 5.39E-11 | 3.21E-11 |
| 32    | 9.42E-11                    | 7.24E-11 | 4.8E-11  | 2.97E-11 | 1.13E-10                     | 7.84E-11 | 5.39E-11 | 3.24E-11 |
| 33    | 9.32E-11                    | 7.21E-11 | 4.81E-11 | 3E-11    | 1.12E-10                     | 7.79E-11 | 5.39E-11 | 3.27E-11 |
| 34    | 9.22E-11                    | 7.17E-11 | 4.82E-11 | 3.03E-11 | 1.1E-10                      | 7.74E-11 | 5.39E-11 | 3.29E-11 |
| 35    | 9.11E-11                    | 7.13E-11 | 4.82E-11 | 3.05E-11 | 1.09E-10                     | 7.68E-11 | 5.38E-11 | 3.31E-11 |
| 36    | 9.01E-11                    | 7.09E-11 | 4.82E-11 | 3.07E-11 | 1.08E-10                     | 7.62E-11 | 5.37E-11 | 3.32E-11 |
| 37    | 8.91E-11                    | 7.05E-11 | 4.81E-11 | 3.08E-11 | 1.07E-10                     | 7.56E-11 | 5.35E-11 | 3.33E-11 |
| 38    | 8.81E-11                    | 7E-11    | 4.8E-11  | 3.09E-11 | 1.05E-10                     | 7.5E-11  | 5.33E-11 | 3.34E-11 |
| 39    | 8.71E-11                    | 6.95E-11 | 4.79E-11 | 3.1E-11  | 1.04E-10                     | 7.44E-11 | 5.31E-11 | 3.34E-11 |
| 40    | 8.61E-11                    | 6.91E-11 | 4.78E-11 | 3.11E-11 | 1.03E-10                     | 7.37E-11 | 5.28E-11 | 3.34E-11 |
| 41    | 8.51E-11                    | 6.85E-11 | 4.76E-11 | 3.12E-11 | 1.01E-10                     | 7.3E-11  | 5.26E-11 | 3.34E-11 |

|    |          |          |          |          |          |          |          |          |
|----|----------|----------|----------|----------|----------|----------|----------|----------|
| 42 | 8.41E-11 | 6.8E-11  | 4.74E-11 | 3.12E-11 | 1E-10    | 7.23E-11 | 5.23E-11 | 3.33E-11 |
| 43 | 8.31E-11 | 6.75E-11 | 4.72E-11 | 3.12E-11 | 9.89E-11 | 7.17E-11 | 5.2E-11  | 3.33E-11 |
| 44 | 8.22E-11 | 6.7E-11  | 4.7E-11  | 3.12E-11 | 9.77E-11 | 7.1E-11  | 5.16E-11 | 3.32E-11 |
| 45 | 8.12E-11 | 6.64E-11 | 4.68E-11 | 3.12E-11 | 9.65E-11 | 7.03E-11 | 5.13E-11 | 3.31E-11 |
| 46 | 8.03E-11 | 6.59E-11 | 4.66E-11 | 3.12E-11 | 9.53E-11 | 6.96E-11 | 5.09E-11 | 3.3E-11  |
| 47 | 7.94E-11 | 6.53E-11 | 4.63E-11 | 3.11E-11 | 9.41E-11 | 6.89E-11 | 5.06E-11 | 3.29E-11 |
| 48 | 7.85E-11 | 6.48E-11 | 4.61E-11 | 3.11E-11 | 9.29E-11 | 6.82E-11 | 5.02E-11 | 3.27E-11 |
| 49 | 7.76E-11 | 6.42E-11 | 4.58E-11 | 3.1E-11  | 9.17E-11 | 6.75E-11 | 4.98E-11 | 3.26E-11 |
| 50 | 7.67E-11 | 6.36E-11 | 4.55E-11 | 3.09E-11 | 9.06E-11 | 6.68E-11 | 4.94E-11 | 3.24E-11 |
| 51 | 7.58E-11 | 6.31E-11 | 4.52E-11 | 3.09E-11 | 8.95E-11 | 6.61E-11 | 4.9E-11  | 3.23E-11 |
| 52 | 7.5E-11  | 6.25E-11 | 4.49E-11 | 3.08E-11 | 8.83E-11 | 6.54E-11 | 4.86E-11 | 3.21E-11 |
| 53 | 7.41E-11 | 6.2E-11  | 4.47E-11 | 3.07E-11 | 8.73E-11 | 6.47E-11 | 4.82E-11 | 3.19E-11 |
| 54 | 7.33E-11 | 6.14E-11 | 4.44E-11 | 3.06E-11 | 8.62E-11 | 6.4E-11  | 4.78E-11 | 3.17E-11 |
| 55 | 7.25E-11 | 6.09E-11 | 4.41E-11 | 3.04E-11 | 8.51E-11 | 6.34E-11 | 4.74E-11 | 3.15E-11 |
| 56 | 7.17E-11 | 6.03E-11 | 4.38E-11 | 3.03E-11 | 8.41E-11 | 6.27E-11 | 4.7E-11  | 3.13E-11 |
| 57 | 7.09E-11 | 5.98E-11 | 4.35E-11 | 3.02E-11 | 8.3E-11  | 6.2E-11  | 4.66E-11 | 3.11E-11 |
| 58 | 7.01E-11 | 5.93E-11 | 4.32E-11 | 3.01E-11 | 8.2E-11  | 6.14E-11 | 4.61E-11 | 3.09E-11 |
| 59 | 6.93E-11 | 5.87E-11 | 4.29E-11 | 2.99E-11 | 8.1E-11  | 6.07E-11 | 4.57E-11 | 3.07E-11 |
| 60 | 6.86E-11 | 5.82E-11 | 4.26E-11 | 2.98E-11 | 8E-11    | 6.01E-11 | 4.53E-11 | 3.05E-11 |
| 61 | 6.78E-11 | 5.77E-11 | 4.23E-11 | 2.97E-11 | 7.91E-11 | 5.94E-11 | 4.49E-11 | 3.03E-11 |
| 62 | 6.71E-11 | 5.72E-11 | 4.2E-11  | 2.95E-11 | 7.81E-11 | 5.88E-11 | 4.45E-11 | 3.01E-11 |
| 63 | 6.64E-11 | 5.67E-11 | 4.16E-11 | 2.94E-11 | 7.72E-11 | 5.82E-11 | 4.41E-11 | 2.98E-11 |
| 64 | 6.57E-11 | 5.62E-11 | 4.13E-11 | 2.92E-11 | 7.63E-11 | 5.76E-11 | 4.37E-11 | 2.96E-11 |
| 65 | 6.5E-11  | 5.57E-11 | 4.1E-11  | 2.91E-11 | 7.54E-11 | 5.69E-11 | 4.33E-11 | 2.94E-11 |
| 66 | 6.43E-11 | 5.52E-11 | 4.07E-11 | 2.9E-11  | 7.45E-11 | 5.63E-11 | 4.29E-11 | 2.92E-11 |
| 67 | 6.36E-11 | 5.47E-11 | 4.04E-11 | 2.88E-11 | 7.36E-11 | 5.57E-11 | 4.25E-11 | 2.9E-11  |
| 68 | 6.3E-11  | 5.42E-11 | 4.01E-11 | 2.87E-11 | 7.28E-11 | 5.52E-11 | 4.21E-11 | 2.87E-11 |
| 69 | 6.23E-11 | 5.37E-11 | 3.99E-11 | 2.85E-11 | 7.19E-11 | 5.46E-11 | 4.17E-11 | 2.85E-11 |
| 70 | 6.17E-11 | 5.32E-11 | 3.96E-11 | 2.84E-11 | 7.11E-11 | 5.4E-11  | 4.13E-11 | 2.83E-11 |
| 71 | 6.11E-11 | 5.28E-11 | 3.93E-11 | 2.82E-11 | 7.03E-11 | 5.34E-11 | 4.09E-11 | 2.81E-11 |
| 72 | 6.04E-11 | 5.23E-11 | 3.9E-11  | 2.81E-11 | 6.95E-11 | 5.29E-11 | 4.05E-11 | 2.78E-11 |
| 73 | 5.98E-11 | 5.19E-11 | 3.87E-11 | 2.79E-11 | 6.87E-11 | 5.23E-11 | 4.02E-11 | 2.76E-11 |
| 74 | 5.92E-11 | 5.14E-11 | 3.84E-11 | 2.77E-11 | 6.79E-11 | 5.18E-11 | 3.98E-11 | 2.74E-11 |
| 75 | 5.87E-11 | 5.1E-11  | 3.81E-11 | 2.76E-11 | 6.71E-11 | 5.13E-11 | 3.94E-11 | 2.72E-11 |
| 76 | 5.81E-11 | 5.05E-11 | 3.78E-11 | 2.74E-11 | 6.64E-11 | 5.07E-11 | 3.9E-11  | 2.7E-11  |
| 77 | 5.75E-11 | 5.01E-11 | 3.76E-11 | 2.73E-11 | 6.57E-11 | 5.02E-11 | 3.87E-11 | 2.67E-11 |
| 78 | 5.7E-11  | 4.97E-11 | 3.73E-11 | 2.71E-11 | 6.49E-11 | 4.97E-11 | 3.83E-11 | 2.65E-11 |
| 79 | 5.64E-11 | 4.93E-11 | 3.7E-11  | 2.7E-11  | 6.42E-11 | 4.92E-11 | 3.8E-11  | 2.63E-11 |
| 80 | 5.59E-11 | 4.88E-11 | 3.67E-11 | 2.68E-11 | 6.35E-11 | 4.87E-11 | 3.76E-11 | 2.61E-11 |
| 81 | 5.53E-11 | 4.84E-11 | 3.65E-11 | 2.67E-11 | 6.28E-11 | 4.82E-11 | 3.73E-11 | 2.59E-11 |
| 82 | 5.48E-11 | 4.8E-11  | 3.62E-11 | 2.65E-11 | 6.22E-11 | 4.77E-11 | 3.69E-11 | 2.57E-11 |
| 83 | 5.43E-11 | 4.76E-11 | 3.59E-11 | 2.64E-11 | 6.15E-11 | 4.73E-11 | 3.66E-11 | 2.55E-11 |
| 84 | 5.38E-11 | 4.72E-11 | 3.57E-11 | 2.62E-11 | 6.08E-11 | 4.68E-11 | 3.63E-11 | 2.53E-11 |
| 85 | 5.33E-11 | 4.68E-11 | 3.54E-11 | 2.61E-11 | 6.02E-11 | 4.63E-11 | 3.59E-11 | 2.51E-11 |
| 86 | 5.28E-11 | 4.65E-11 | 3.52E-11 | 2.59E-11 | 5.96E-11 | 4.59E-11 | 3.56E-11 | 2.49E-11 |
| 87 | 5.23E-11 | 4.61E-11 | 3.49E-11 | 2.58E-11 | 5.89E-11 | 4.54E-11 | 3.53E-11 | 2.47E-11 |
| 88 | 5.19E-11 | 4.57E-11 | 3.47E-11 | 2.56E-11 | 5.83E-11 | 4.5E-11  | 3.5E-11  | 2.45E-11 |

|     |          |          |          |          |          |          |          |          |
|-----|----------|----------|----------|----------|----------|----------|----------|----------|
| 89  | 5.14E-11 | 4.53E-11 | 3.44E-11 | 2.55E-11 | 5.77E-11 | 4.46E-11 | 3.46E-11 | 2.43E-11 |
| 90  | 5.09E-11 | 4.5E-11  | 3.42E-11 | 2.53E-11 | 5.71E-11 | 4.41E-11 | 3.43E-11 | 2.41E-11 |
| 91  | 5.05E-11 | 4.46E-11 | 3.39E-11 | 2.52E-11 | 5.65E-11 | 4.37E-11 | 3.4E-11  | 2.39E-11 |
| 92  | 5E-11    | 4.43E-11 | 3.37E-11 | 2.51E-11 | 5.6E-11  | 4.33E-11 | 3.37E-11 | 2.37E-11 |
| 93  | 4.96E-11 | 4.39E-11 | 3.35E-11 | 2.49E-11 | 5.54E-11 | 4.29E-11 | 3.34E-11 | 2.35E-11 |
| 94  | 4.92E-11 | 4.36E-11 | 3.32E-11 | 2.48E-11 | 5.48E-11 | 4.25E-11 | 3.31E-11 | 2.33E-11 |
| 95  | 4.87E-11 | 4.32E-11 | 3.3E-11  | 2.46E-11 | 5.43E-11 | 4.21E-11 | 3.28E-11 | 2.31E-11 |
| 96  | 4.83E-11 | 4.29E-11 | 3.28E-11 | 2.45E-11 | 5.37E-11 | 4.17E-11 | 3.25E-11 | 2.29E-11 |
| 97  | 4.79E-11 | 4.26E-11 | 3.25E-11 | 2.43E-11 | 5.32E-11 | 4.13E-11 | 3.23E-11 | 2.27E-11 |
| 98  | 4.75E-11 | 4.22E-11 | 3.23E-11 | 2.42E-11 | 5.27E-11 | 4.09E-11 | 3.2E-11  | 2.26E-11 |
| 99  | 4.71E-11 | 4.19E-11 | 3.21E-11 | 2.41E-11 | 5.22E-11 | 4.05E-11 | 3.17E-11 | 2.24E-11 |
| 100 | 4.67E-11 | 4.16E-11 | 3.19E-11 | 2.39E-11 | 5.17E-11 | 4.02E-11 | 3.14E-11 | 2.22E-11 |

**Table S2: Data of rate coefficients of de-excitation transitions for the comparison of *para* H<sub>2</sub> and He as a function of temperature.**

| T (K) | <i>para</i> -H <sub>2</sub> |          |          |          | He       |          |          |          |
|-------|-----------------------------|----------|----------|----------|----------|----------|----------|----------|
|       | 3-1                         | 5-1      | 7-1      | 9-1      | 3-1      | 5-1      | 7-1      | 9-1      |
| 5     | 9.58E-11                    | 2.24E-11 | 4.37E-12 | 6.43E-13 | 2.30E-11 | 1.08E-11 | 5.63E-12 | 2.88E-12 |
| 6     | 9.23E-11                    | 2.55E-11 | 6.27E-12 | 1.23E-12 | 2.30E-11 | 1.09E-11 | 5.73E-12 | 2.93E-12 |
| 7     | 8.88E-11                    | 2.77E-11 | 8.01E-12 | 1.93E-12 | 2.30E-11 | 1.09E-11 | 5.79E-12 | 2.98E-12 |
| 8     | 8.54E-11                    | 2.93E-11 | 9.56E-12 | 2.68E-12 | 2.28E-11 | 1.09E-11 | 5.84E-12 | 3.02E-12 |
| 9     | 8.24E-11                    | 3.04E-11 | 1.09E-11 | 3.45E-12 | 2.26E-11 | 1.08E-11 | 5.86E-12 | 3.06E-12 |
| 10    | 7.97E-11                    | 3.12E-11 | 1.21E-11 | 4.19E-12 | 2.25E-11 | 1.07E-11 | 5.88E-12 | 3.09E-12 |
| 11    | 7.73E-11                    | 3.17E-11 | 1.30E-11 | 4.89E-12 | 2.23E-11 | 1.06E-11 | 5.88E-12 | 3.13E-12 |
| 12    | 7.51E-11                    | 3.21E-11 | 1.39E-11 | 5.55E-12 | 2.21E-11 | 1.05E-11 | 5.88E-12 | 3.16E-12 |
| 13    | 7.31E-11                    | 3.24E-11 | 1.46E-11 | 6.15E-12 | 2.19E-11 | 1.04E-11 | 5.88E-12 | 3.19E-12 |
| 14    | 7.12E-11                    | 3.25E-11 | 1.52E-11 | 6.70E-12 | 2.17E-11 | 1.03E-11 | 5.87E-12 | 3.22E-12 |
| 15    | 6.95E-11                    | 3.26E-11 | 1.57E-11 | 7.19E-12 | 2.15E-11 | 1.02E-11 | 5.85E-12 | 3.25E-12 |
| 16    | 6.80E-11                    | 3.26E-11 | 1.61E-11 | 7.64E-12 | 2.14E-11 | 1.01E-11 | 5.84E-12 | 3.28E-12 |
| 17    | 6.65E-11                    | 3.26E-11 | 1.65E-11 | 8.03E-12 | 2.12E-11 | 9.96E-12 | 5.82E-12 | 3.30E-12 |
| 18    | 6.51E-11                    | 3.25E-11 | 1.67E-11 | 8.38E-12 | 2.11E-11 | 9.86E-12 | 5.81E-12 | 3.32E-12 |
| 19    | 6.38E-11                    | 3.23E-11 | 1.70E-11 | 8.68E-12 | 2.09E-11 | 9.77E-12 | 5.79E-12 | 3.34E-12 |
| 20    | 6.25E-11                    | 3.22E-11 | 1.71E-11 | 8.95E-12 | 2.08E-11 | 9.68E-12 | 5.77E-12 | 3.36E-12 |
| 21    | 6.13E-11                    | 3.20E-11 | 1.72E-11 | 9.18E-12 | 2.06E-11 | 9.60E-12 | 5.75E-12 | 3.38E-12 |
| 22    | 6.02E-11                    | 3.17E-11 | 1.73E-11 | 9.38E-12 | 2.05E-11 | 9.51E-12 | 5.73E-12 | 3.40E-12 |
| 23    | 5.91E-11                    | 3.15E-11 | 1.74E-11 | 9.54E-12 | 2.04E-11 | 9.44E-12 | 5.71E-12 | 3.41E-12 |
| 24    | 5.80E-11                    | 3.12E-11 | 1.74E-11 | 9.68E-12 | 2.03E-11 | 9.36E-12 | 5.69E-12 | 3.43E-12 |
| 25    | 5.70E-11                    | 3.09E-11 | 1.74E-11 | 9.80E-12 | 2.02E-11 | 9.29E-12 | 5.67E-12 | 3.44E-12 |
| 26    | 5.60E-11                    | 3.06E-11 | 1.74E-11 | 9.89E-12 | 2.01E-11 | 9.22E-12 | 5.66E-12 | 3.45E-12 |
| 27    | 5.50E-11                    | 3.03E-11 | 1.73E-11 | 9.96E-12 | 2.00E-11 | 9.15E-12 | 5.64E-12 | 3.46E-12 |
| 28    | 5.40E-11                    | 3.00E-11 | 1.73E-11 | 1.00E-11 | 1.99E-11 | 9.09E-12 | 5.62E-12 | 3.47E-12 |
| 29    | 5.31E-11                    | 2.97E-11 | 1.72E-11 | 1.01E-11 | 1.98E-11 | 9.03E-12 | 5.60E-12 | 3.48E-12 |
| 30    | 5.22E-11                    | 2.94E-11 | 1.71E-11 | 1.01E-11 | 1.97E-11 | 8.97E-12 | 5.58E-12 | 3.49E-12 |
| 31    | 5.13E-11                    | 2.90E-11 | 1.70E-11 | 1.01E-11 | 1.96E-11 | 8.92E-12 | 5.56E-12 | 3.50E-12 |
| 32    | 5.04E-11                    | 2.87E-11 | 1.69E-11 | 1.01E-11 | 1.95E-11 | 8.86E-12 | 5.55E-12 | 3.51E-12 |

|    |          |          |          |          |          |          |          |          |
|----|----------|----------|----------|----------|----------|----------|----------|----------|
| 33 | 4.96E-11 | 2.83E-11 | 1.68E-11 | 1.01E-11 | 1.95E-11 | 8.81E-12 | 5.53E-12 | 3.51E-12 |
| 34 | 4.88E-11 | 2.80E-11 | 1.66E-11 | 1.01E-11 | 1.94E-11 | 8.76E-12 | 5.51E-12 | 3.52E-12 |
| 35 | 4.80E-11 | 2.76E-11 | 1.65E-11 | 1.00E-11 | 1.93E-11 | 8.71E-12 | 5.50E-12 | 3.53E-12 |
| 36 | 4.72E-11 | 2.73E-11 | 1.63E-11 | 9.98E-12 | 1.92E-11 | 8.67E-12 | 5.48E-12 | 3.53E-12 |
| 37 | 4.64E-11 | 2.70E-11 | 1.62E-11 | 9.94E-12 | 1.92E-11 | 8.62E-12 | 5.46E-12 | 3.54E-12 |
| 38 | 4.57E-11 | 2.66E-11 | 1.60E-11 | 9.89E-12 | 1.91E-11 | 8.58E-12 | 5.45E-12 | 3.54E-12 |
| 39 | 4.49E-11 | 2.63E-11 | 1.59E-11 | 9.83E-12 | 1.90E-11 | 8.54E-12 | 5.43E-12 | 3.54E-12 |
| 40 | 4.42E-11 | 2.59E-11 | 1.57E-11 | 9.78E-12 | 1.90E-11 | 8.50E-12 | 5.42E-12 | 3.55E-12 |
| 41 | 4.35E-11 | 2.56E-11 | 1.56E-11 | 9.71E-12 | 1.89E-11 | 8.46E-12 | 5.40E-12 | 3.55E-12 |
| 42 | 4.28E-11 | 2.53E-11 | 1.54E-11 | 9.65E-12 | 1.89E-11 | 8.42E-12 | 5.39E-12 | 3.55E-12 |
| 43 | 4.22E-11 | 2.50E-11 | 1.52E-11 | 9.58E-12 | 1.88E-11 | 8.38E-12 | 5.38E-12 | 3.56E-12 |
| 44 | 4.15E-11 | 2.46E-11 | 1.51E-11 | 9.50E-12 | 1.88E-11 | 8.35E-12 | 5.36E-12 | 3.56E-12 |
| 45 | 4.09E-11 | 2.43E-11 | 1.49E-11 | 9.43E-12 | 1.87E-11 | 8.32E-12 | 5.35E-12 | 3.56E-12 |
| 46 | 4.03E-11 | 2.40E-11 | 1.47E-11 | 9.35E-12 | 1.87E-11 | 8.28E-12 | 5.33E-12 | 3.56E-12 |
| 47 | 3.97E-11 | 2.37E-11 | 1.46E-11 | 9.27E-12 | 1.86E-11 | 8.25E-12 | 5.32E-12 | 3.56E-12 |
| 48 | 3.91E-11 | 2.34E-11 | 1.44E-11 | 9.20E-12 | 1.86E-11 | 8.22E-12 | 5.31E-12 | 3.56E-12 |
| 49 | 3.85E-11 | 2.31E-11 | 1.43E-11 | 9.11E-12 | 1.85E-11 | 8.19E-12 | 5.30E-12 | 3.56E-12 |
| 50 | 3.79E-11 | 2.28E-11 | 1.41E-11 | 9.03E-12 | 1.85E-11 | 8.16E-12 | 5.28E-12 | 3.56E-12 |
| 51 | 3.74E-11 | 2.25E-11 | 1.39E-11 | 8.95E-12 |          |          |          |          |
| 52 | 3.68E-11 | 2.22E-11 | 1.38E-11 | 8.87E-12 |          |          |          |          |
| 53 | 3.63E-11 | 2.19E-11 | 1.36E-11 | 8.79E-12 |          |          |          |          |
| 54 | 3.58E-11 | 2.16E-11 | 1.35E-11 | 8.70E-12 |          |          |          |          |
| 55 | 3.52E-11 | 2.13E-11 | 1.33E-11 | 8.62E-12 |          |          |          |          |
| 56 | 3.47E-11 | 2.11E-11 | 1.32E-11 | 8.54E-12 |          |          |          |          |
| 57 | 3.43E-11 | 2.08E-11 | 1.30E-11 | 8.46E-12 |          |          |          |          |
| 58 | 3.38E-11 | 2.05E-11 | 1.29E-11 | 8.37E-12 |          |          |          |          |
| 59 | 3.33E-11 | 2.03E-11 | 1.27E-11 | 8.29E-12 |          |          |          |          |
| 60 | 3.29E-11 | 2.00E-11 | 1.26E-11 | 8.21E-12 |          |          |          |          |
| 61 | 3.24E-11 | 1.98E-11 | 1.24E-11 | 8.13E-12 |          |          |          |          |
| 62 | 3.20E-11 | 1.95E-11 | 1.23E-11 | 8.05E-12 |          |          |          |          |
| 63 | 3.15E-11 | 1.93E-11 | 1.21E-11 | 7.97E-12 |          |          |          |          |
| 64 | 3.11E-11 | 1.91E-11 | 1.20E-11 | 7.89E-12 |          |          |          |          |
| 65 | 3.07E-11 | 1.88E-11 | 1.19E-11 | 7.81E-12 |          |          |          |          |
| 66 | 3.03E-11 | 1.86E-11 | 1.17E-11 | 7.73E-12 |          |          |          |          |
| 67 | 2.99E-11 | 1.84E-11 | 1.16E-11 | 7.66E-12 |          |          |          |          |
| 68 | 2.95E-11 | 1.82E-11 | 1.15E-11 | 7.58E-12 |          |          |          |          |
| 69 | 2.91E-11 | 1.79E-11 | 1.14E-11 | 7.50E-12 |          |          |          |          |
| 70 | 2.88E-11 | 1.77E-11 | 1.12E-11 | 7.43E-12 |          |          |          |          |
| 71 | 2.84E-11 | 1.75E-11 | 1.11E-11 | 7.36E-12 |          |          |          |          |
| 72 | 2.80E-11 | 1.73E-11 | 1.10E-11 | 7.28E-12 |          |          |          |          |
| 73 | 2.77E-11 | 1.71E-11 | 1.09E-11 | 7.21E-12 |          |          |          |          |
| 74 | 2.74E-11 | 1.69E-11 | 1.07E-11 | 7.14E-12 |          |          |          |          |
| 75 | 2.70E-11 | 1.67E-11 | 1.06E-11 | 7.07E-12 |          |          |          |          |
| 76 | 2.67E-11 | 1.65E-11 | 1.05E-11 | 7.00E-12 |          |          |          |          |
| 77 | 2.64E-11 | 1.63E-11 | 1.04E-11 | 6.93E-12 |          |          |          |          |
| 78 | 2.60E-11 | 1.62E-11 | 1.03E-11 | 6.86E-12 |          |          |          |          |
| 79 | 2.57E-11 | 1.60E-11 | 1.02E-11 | 6.79E-12 |          |          |          |          |

|     |          |          |          |          |
|-----|----------|----------|----------|----------|
| 80  | 2.54E-11 | 1.58E-11 | 1.01E-11 | 6.73E-12 |
| 81  | 2.51E-11 | 1.56E-11 | 9.96E-12 | 6.66E-12 |
| 82  | 2.48E-11 | 1.54E-11 | 9.86E-12 | 6.60E-12 |
| 83  | 2.45E-11 | 1.53E-11 | 9.75E-12 | 6.53E-12 |
| 84  | 2.43E-11 | 1.51E-11 | 9.65E-12 | 6.47E-12 |
| 85  | 2.40E-11 | 1.49E-11 | 9.55E-12 | 6.41E-12 |
| 86  | 2.37E-11 | 1.48E-11 | 9.45E-12 | 6.35E-12 |
| 87  | 2.34E-11 | 1.46E-11 | 9.36E-12 | 6.29E-12 |
| 88  | 2.32E-11 | 1.45E-11 | 9.26E-12 | 6.23E-12 |
| 89  | 2.29E-11 | 1.43E-11 | 9.17E-12 | 6.17E-12 |
| 90  | 2.27E-11 | 1.42E-11 | 9.08E-12 | 6.11E-12 |
| 91  | 2.24E-11 | 1.40E-11 | 8.99E-12 | 6.05E-12 |
| 92  | 2.22E-11 | 1.39E-11 | 8.90E-12 | 6.00E-12 |
| 93  | 2.19E-11 | 1.37E-11 | 8.81E-12 | 5.94E-12 |
| 94  | 2.17E-11 | 1.36E-11 | 8.72E-12 | 5.89E-12 |
| 95  | 2.15E-11 | 1.34E-11 | 8.64E-12 | 5.83E-12 |
| 96  | 2.12E-11 | 1.33E-11 | 8.55E-12 | 5.78E-12 |
| 97  | 2.10E-11 | 1.32E-11 | 8.47E-12 | 5.72E-12 |
| 98  | 2.08E-11 | 1.30E-11 | 8.39E-12 | 5.67E-12 |
| 99  | 2.06E-11 | 1.29E-11 | 8.31E-12 | 5.62E-12 |
| 100 | 2.04E-11 | 1.28E-11 | 8.23E-12 | 5.57E-12 |

Table S3: Python program for generating PES.

| Program for generating PES                                                                                                                                                                                                                                                                                                                                                                                                                                                                                                                                                                                                                                                                                                                                                                                                                                                                                                                                                                                                                                                                                                                                                                                                                                                                                                                                                                                                                                                                                                                                                                                                                                                                                                   | Analytical expression                                                                                                                                                                                                                                                                                                                                                                                                                                                                                                                                                                                                                                                                                                                                                                                                                                                                                                                                                      |
|------------------------------------------------------------------------------------------------------------------------------------------------------------------------------------------------------------------------------------------------------------------------------------------------------------------------------------------------------------------------------------------------------------------------------------------------------------------------------------------------------------------------------------------------------------------------------------------------------------------------------------------------------------------------------------------------------------------------------------------------------------------------------------------------------------------------------------------------------------------------------------------------------------------------------------------------------------------------------------------------------------------------------------------------------------------------------------------------------------------------------------------------------------------------------------------------------------------------------------------------------------------------------------------------------------------------------------------------------------------------------------------------------------------------------------------------------------------------------------------------------------------------------------------------------------------------------------------------------------------------------------------------------------------------------------------------------------------------------|----------------------------------------------------------------------------------------------------------------------------------------------------------------------------------------------------------------------------------------------------------------------------------------------------------------------------------------------------------------------------------------------------------------------------------------------------------------------------------------------------------------------------------------------------------------------------------------------------------------------------------------------------------------------------------------------------------------------------------------------------------------------------------------------------------------------------------------------------------------------------------------------------------------------------------------------------------------------------|
| <pre> # Import math Library import math; import os; path = os.getcwd() print(path) for l in range (0,1,30):     phi = int(l)     directory2 = path+ "/" + "%s"%(str(l))     if not os.path.exists(directory2):         os.makedirs(directory2)     os.chdir(directory2)     for k in range (0,1,30):         theta2 = int(k)         directory1 = directory2+ "/" + "%s"%(str(k))         if not os.path.exists(directory1):             os.makedirs(directory1)         os.chdir(directory1)         for j in range (0,1,15):             theta1 = int(j)             directory = path+ "/" + "%s"%(str(j))             if not os.path.exists(directory):                 os.makedirs(directory)             os.chdir(directory)             for i in range (76):                 R=i/10.0+2.5                 r1 = 1.9534                 r2 = 0.6445                 rh = 0.3714                 a1 = math.sin(math.radians(theta1))*math.sin(math.radians(phi))                 a2 = math.sin(math.radians(theta1))*math.cos(math.radians(phi))                 a3 = math.cos(math.radians(theta1))                 b1 = math.sin(math.radians(theta2))                 b2 = math.cos(math.radians(theta2))                 r1l = R-rh*b2                 r2l = R+rh*b2                 f= open("%d.gif" %i, "w+") # w+=write/r=read                 f.write("%nprocshared=4")             %%mem=10GB             %%chk=%d_%d_%d.chk             # CCSD=(T,SaveAmplitudes,ReadAmplitudes)/aug-cc-pVTZ  R = %d, phi=%d, theta2=%d, theta1=%d,  0 3 C    %.4f    %.4f    %.4f C    %.4f    %.4f    %.4f C    %.4f    %.4f    %.4f C    %.4f    %.4f    %.4f H    0.0000    %.4f    %.4f H    0.0000    %.4f    %.4f </pre> | <p>General Experssion:</p> $ \begin{array}{lll} C & r1 * \sin(\theta1) * \sin(\phi) & r1 * \sin(\theta1) * \cos(\phi) & r1 * \cos(\theta1) \\ C & r2 * \sin(\theta1) * \sin(\phi) & r2 * \sin(\theta1) * \cos(\phi) & r2 * \cos(\theta1) \\ C & -r2 * \sin(\theta1) * \sin(\phi) & -r2 * \sin(\theta1) * \cos(\phi) & -r2 * \cos(\theta1) \\ C & -r1 * \sin(\theta1) * \sin(\phi) & -r1 * \sin(\theta1) * \cos(\phi) & -r1 * \cos(\theta1) \\ H & 0.0000 & rh * \sin(\theta2) & R + rh * \cos(\theta2) \\ H & 0.0000 & rh * \sin(\theta2) & R - rh * \cos(\theta2) \end{array} $ <p>Stationary point (Global Minimum)<br/> <math>\phi, \theta_2, \theta_1 = 0^\circ, 90^\circ, 90^\circ</math> and <math>R = 3.4 \text{ \AA}</math></p> $ \begin{array}{lll} C & 0.0000 & 1.9534 & 0.0000 \\ C & 0.0000 & 0.6445 & 0.0000 \\ C & 0.0000 & -0.6445 & 0.0000 \\ C & 0.0000 & -1.9534 & 0.0000 \\ H & 0.0000 & 0.3714 & 3.4000 \\ H & 0.0000 & -0.3714 & 3.4000 \end{array} $ |

|                                                                                                                                                                                                                                           |  |
|-------------------------------------------------------------------------------------------------------------------------------------------------------------------------------------------------------------------------------------------|--|
| <pre> """%(phi,theta2,theta1,R,phi,theta2,theta1, r1*a1,r1*a2,r1*a3, r2*a1,r2*a2,r2*a3, -r2*a1,-r2*a2,-r2*a3, -r1*a1,-r1*a2,-r1*a3,rh*b1,r11,- rh*b1,r21))  f.close() os.chdir(directory) os.chdir(directory) os.chdir(directory2) </pre> |  |
|-------------------------------------------------------------------------------------------------------------------------------------------------------------------------------------------------------------------------------------------|--|

**Table S4:** *Ab initio* energies ( $C_4-H_2$ ) at various geometries compared to recreated PES (from radial terms).

| Geometry<br>( $\phi, \theta_2, \theta_1, R$ )  | Ab initio energy | Recreated PES (from radial terms) |
|------------------------------------------------|------------------|-----------------------------------|
| $0^\circ, 90^\circ, 90^\circ, 3.4 \text{ \AA}$ | -147.79          | -147.47                           |
| $0^\circ, 0^\circ, 0^\circ, 5.4 \text{ \AA}$   | -144.83          | -144.49                           |
| $0^\circ, 90^\circ, 0^\circ, 5.9 \text{ \AA}$  | -18.78           | -17.89                            |

**Table S5:** Computed properties of  $C_4$  compared to previous literature.

| Properties ( $C_4$ )                         | Current work                                                                                                                                                                                                                                                                                  | Previous Literature                                                                                                                     |
|----------------------------------------------|-----------------------------------------------------------------------------------------------------------------------------------------------------------------------------------------------------------------------------------------------------------------------------------------------|-----------------------------------------------------------------------------------------------------------------------------------------|
| Vibrational Frequencies ( $\text{cm}^{-1}$ ) | CCSD(T)/aug-cc-pVQZ (Harmonic)<br><br>No. Freq in $\text{cm}^{-1}$ [D] (mode)<br>1. 2107 [1] (stretching $\Sigma_g$ )<br>2. 1596 [1] (stretching $\Sigma_u$ )<br>3. 942 [1] (stretching $\Sigma_g$ )<br>4. 369 [2] (bending $\Pi_g$ )<br>5. 168 [2] (bending $\Pi_u$ )<br><br>[D]: Degeneracy | Experimental <sup>1</sup> :<br><br>No. Freq in $\text{cm}^{-1}$<br>1. 2057<br>2. 1549<br>3. N.A.<br>4. 323<br>5. 160                    |
| Bond lengths ( $\text{\AA}$ )                | 1.2890 (inner)<br>1.3089 (outer)<br>(CCSD(T)/CBS(DTQ))                                                                                                                                                                                                                                        | Experimental: 1.304 (all same) <sup>1</sup><br>1.3167 (inner) 1.2960 (outer) <sup>2</sup><br>1.2840 (inner) 1.3060 (outer) <sup>3</sup> |

1. "National Institute of Standards and Technology | NIST." NIST, 22 Dec. 2023, [www.nist.gov](http://www.nist.gov).
2. Lique, François, et al., *Phys. Chem. Chem. Phys.*, 12, 15672-15680 (2010).
3. Van Orden, Alan, et al., *Chem. Rev.*, 98, 2313-2358 (1998).



Figure S1: Cross-sections for the rotational excitation (1-N) transitions of collision of  $C_4$  with *ortho* -  $H_2$  till energy range of  $300\text{ cm}^{-1}$ .

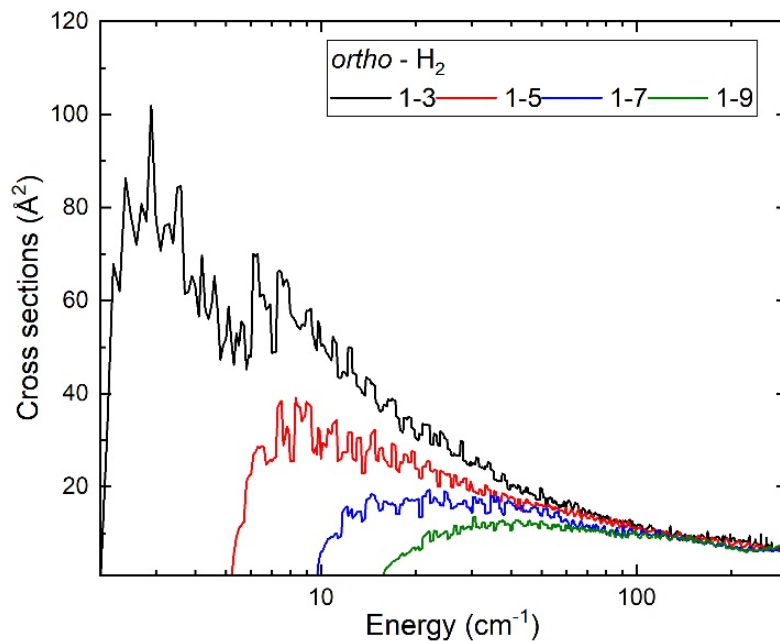

Figure S2: Comparison between the cross-sections ( $\Delta j = 2$ ) computed for  $C_4$  molecule due to its collision with *para* and *ortho* -  $H_2$  for different transitions as shown: Solid corresponds to *ortho* -  $H_2$  while dotted corresponds to *para* -  $H_2$ .

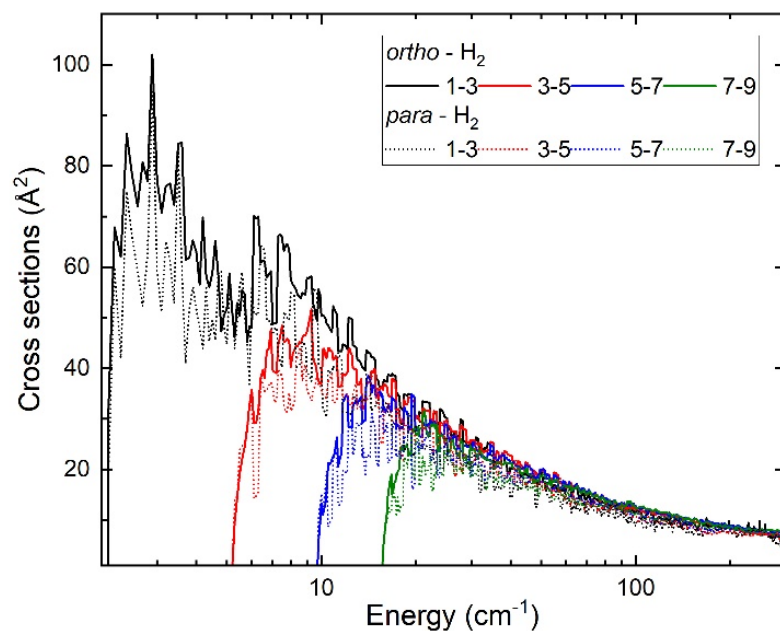

Figure S3: Cross-sections for the rotational excitation transitions ( $\Delta j = 2$ ) of collision of  $C_4$  with *ortho* -  $H_2$  till energy range of  $300\text{ cm}^{-1}$ .

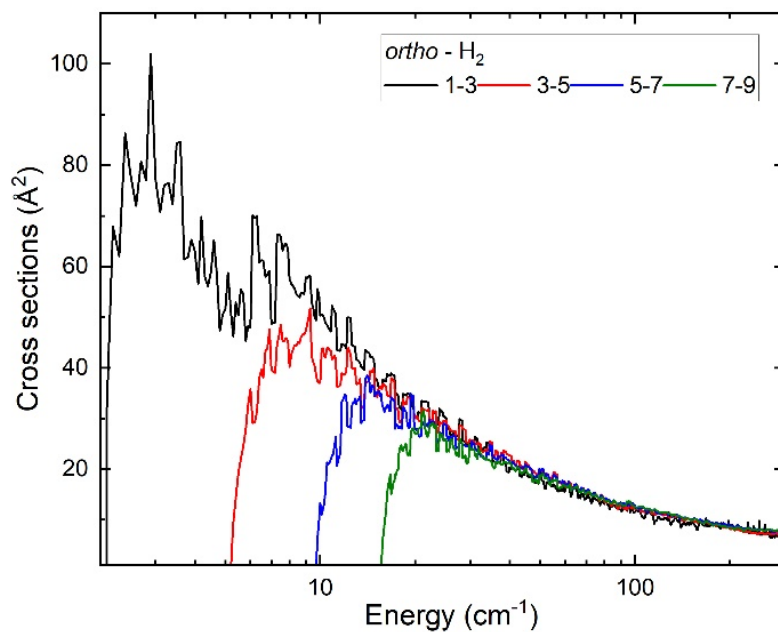

Figure S4: Cross-sections for the rotational excitation transitions (1-N) of collision of  $C_4$  with *para* -  $H_2$  till energy range of  $300\text{ cm}^{-1}$ .

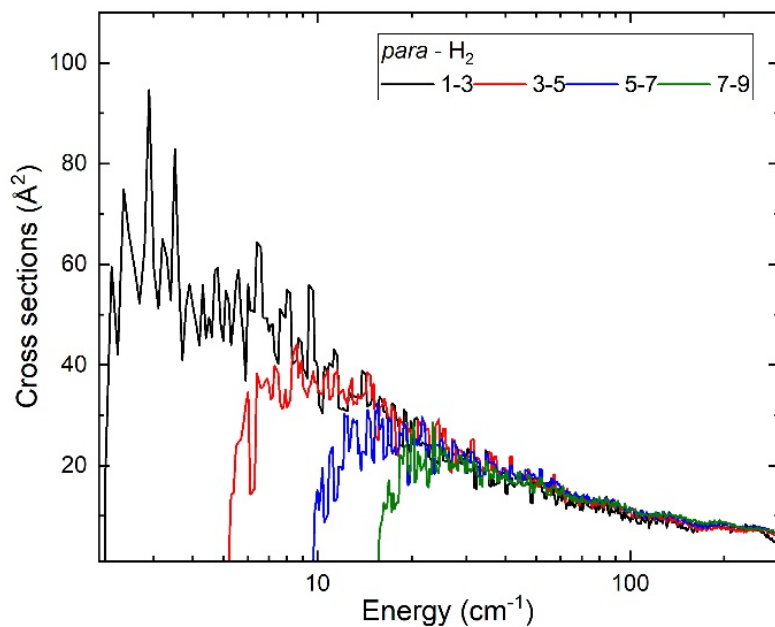

Figure S5: PES at various angular coordinates ( $\phi$ ,  $\theta_2$ ,  $\theta_1$ , R) with respect to R.

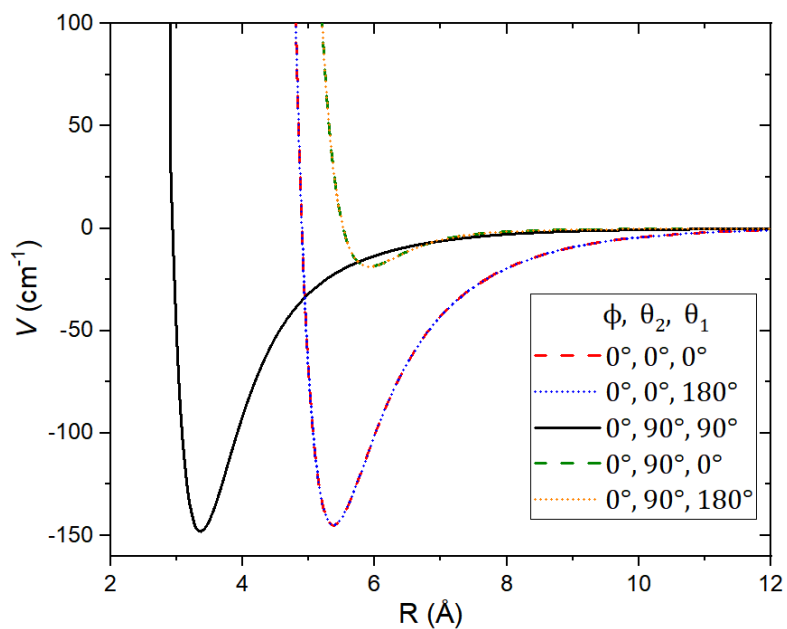

Figure S6: Variation of R (optimised) with respect to  $\theta_2$  vs  $\theta_1$  at  $\phi = 0^\circ$ .

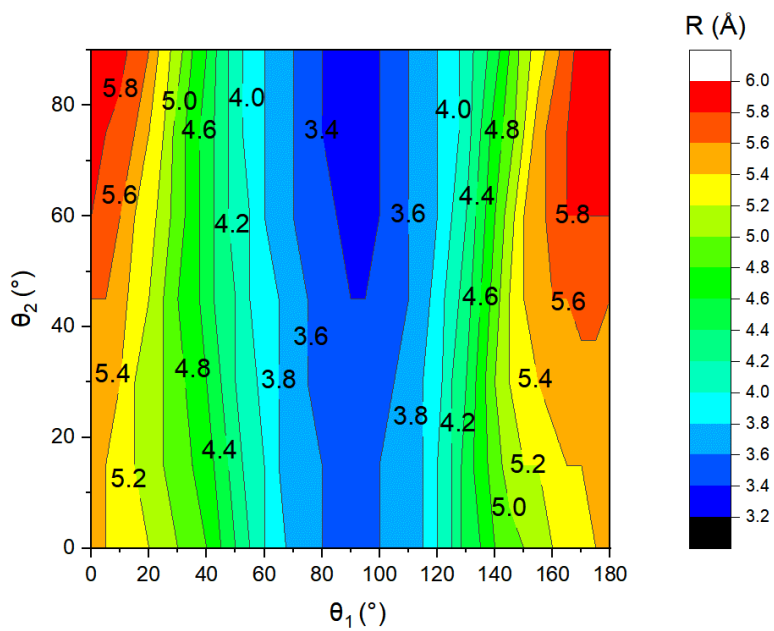

Supplement: d3cp05424a1.pdf [file d3cp05424a1.pdf]
